# Supplementary material for: De novo assembly and characterization of breast cancer transcriptomes identifies large numbers of novel fusion-gene transcripts of potential functional significance
Source: BMC Med Genomics. 2017 Aug 29;10:53. doi: 10.1186/s12920-017-0289-7 (PMC5575902; doi:10.1186/s12920-017-0289-7)
Supplement: Supplementary file 7 — Cancer specific chimeric transcripts with fused 5′ or 3′ UTRs and having the ORF of the coding gene intact and displaying >2X change in expression relative to the intact gene’s expression in normal tissue. The first sheet in the excel file contains the key defining column entries. The second sheet contains data for chimeras with a fused 5′ UTR; the third sheet contains data for chimeras with a fused 3′ UTR. For 5′-UTR fusions, the expression fold change for the 3′ partner gene is calculated; for 3′ UTR fusions, the expression fold change for the 5′ partner gene is calculated. The upper portion in each data sheet summarizes the down-regulated genes and the lower portion summarizes the up-regulated genes. (XLSX 27 kb) [file 12920_2017_289_MOESM7_ESM.xlsx]

## Sheet: key
Additional File 7. Key
#contigId	contig ID assigned by the assembler (unique for each contig)
contigLen	contig length
chr1	chromosome to which 5'- part of the chimeric transcript maps
5tSt	chromosome start point for 5'- part
5tEn	chromosome end point for 5'- part
strand1	alignment orientation (+ means forward strand, - means negative strand) for the 5'- part
5qSt	start point on the query (contig) sequence representing chimer for the 5'- part
5qEn	end point on the query (contig) sequence representing chimer for the 5'- part
5tx	5' reference transcript involved in the chimeric transcript
geneName1	gene symbol corresponding to the 5' reference transcript
chr2	chromosome to which 3'- part of the chimeric transcript maps
3tSt	chromosome start point for 3'- part
3tEn	chromosome end point for 3'- part
strand2	alignment orientation (+ means forward strand, - means negative strand) for the 3'- part
3qSt	start point on the query (contig) sequence representing chimer for the 3'- part
3qEn	end point on the query (contig) sequence representing chimer for the 3'- part
3tx	3' reference transcript involved in the chimeric transcript
geneName2	gene symbol corresponding to the 3' reference transcript
chimerType	structure based classification of the chimeric transcript
annotation	annotation for the chimeric transcript
functionalClass	functional characterization/classification
3FC / 5FC	fold change in the expression of the reference transcript associated with the chimer (3FC for 5'UTR change and 5FC for 3'UTR change)
comparisonStatus	whether chimeric transcript was normal specific, shared or cancer specific
diseaseStatus	disease status (normal or cancer) of the tissue sample the chimer was detected in
patientId	TCGA patient ID
assignedSampleId	assigned sample ID
Note:	Upper half of the data sheet is for the down-regulated genes and lower half is for the up-regulated genes

## Sheet: 5'UTR change
Additional File 7. Cancer specific chimeric transcripts with fused 5’ UTRs and having the ORF of the coding gene intact and displaying > 2X change in expression relative to the intact gene’s expression in normal tissue.
#contigId	contigLen	chr1	5tSt	5tEn	strand1	5qSt	5qEn	5tx	geneName1	chr2	3tSt	3tEn	strand2	3qSt	3qEn	3tx	geneName2	chimerType	annotation	functionalClass	3FC	comparisonStatus	diseaseStatus	patientId	assignedSampleId
k28_667039_1213_19276	1196	chr7	149018113	149018399	+	1142	1196	ENST00000427009	AC004941.5	chr14	81646615	81686935	+	0	1155	ENST00000298173	GTF2A1	IntergenicChimera	cds unchanged, alternative 5UTR from NonCoding	5'UTR change	0.37	cancer specific	cancer	TCGA-A2-A04Q	P31_C
k26_887272_2319_149225	2268	chr11	46142604	46142686	-	0	82	ENST00000257821	PHF21A	chr1	25071972	25168812	+	54	2268	ENST00000374379	CLIC4	IntergenicChimera	cds unchanged, alternative 5UTR	5'UTR change	0.41	cancer specific	cancer	TCGA-AN-A046	P50_C
k26_707294_1415_122281	1415	chr9	131094431	131094603	+	0	172	ENST00000461102	COQ4	chr7	73646276	73668739	-	165	1415	ENST00000055077	RFC2	IntergenicChimera	cds unchanged, alternative 5UTR from NonCoding	5'UTR change	2.02	cancer specific	cancer	TCGA-A2-A04T	P36_C
k28_639044_1820_113572	1820	chr6	15246285	15496727	-	0	1756	none	none	chr16	30087339	30087416	+	1743	1820	ENST00000279387	PPP4C	GeneDesertChimera	cds unchanged, alternative 5UTR from gene-desert	5'UTR change	2.1	cancer specific	cancer	TCGA-AO-A03M	P20_C
k26_488439_500_3903	500	chr1	89990533	89990582	+	0	49	ENST00000330947	LRRC8B	chr10	81702540	81777633	-	46	500	ENST00000372292	SFTPD	IntergenicChimera	cds unchanged, alternative 5UTR	5'UTR change	2.14	cancer specific	cancer	TCGA-AQ-A04H	P11_C
k26_729964_112_17466	112	chr10	93567221	93567246	+	0	25	ENST00000318333	SRP9P1	chr1	225965527	225965617	+	22	112	ENST00000304786	SRP9	IntergenicChimera	cds unchanged, alternative 5UTR from NonCoding	5'UTR change	2.17	cancer specific	cancer	TCGA-AN-A046	P50_C
k30_11292_105_6532	105	chr5	159674547	159674573	-	1	27	ENST00000523689	RP11-34P1.1	chr2	264938	265011	+	28	101	ENST00000272065	ACP1	IntergenicChimera	cds unchanged, alternative 5UTR from NonCoding	5'UTR change	2.18	cancer specific	cancer	TCGA-A2-A04X	P37_C
k26_1044453_190_1218	190	chr12	67462829	67462995	-	0	166	ENST00000535721	RP11-123O10.4	chr12	70671909	70671935	+	164	190	ENST00000229195	CNOT2	IntergenicChimera	cds unchanged, alternative 5UTR from NonCoding	5'UTR change	2.22	cancer specific	cancer	TCGA-AN-A0AS	P41_C
k32_42852_136_5250	136	chr15	40854179	40855001	-	0	58	ENST00000560109	C15orf57	chr7	26241364	26241442	+	58	136	ENST00000396386	CBX3	IntergenicChimera	cds unchanged, alternative 5UTR from NonCoding	5'UTR change	2.28	cancer specific	cancer	TCGA-BH-A0B1	P13_C
k32_469406_1740_55996	1720	chr20	34329914	34330175	-	1459	1720	ENST00000338163	RBM39	chr18	61637370	61654833	+	0	1490	ENST00000353706	SERPINB8	IntergenicChimera	cds unchanged, alternative 5UTR	5'UTR change	2.37	cancer specific	cancer	TCGA-AO-A03U	P22_C
k30_539008_70_2224	70	chr16	2382641	2382670	+	0	29	ENST00000468708	RP11-715J22.1	chr19	39926543	39926586	-	27	70	ENST00000251453	RPS16	IntergenicChimera	cds unchanged, alternative 5UTR from NonCoding	5'UTR change	3.06	cancer specific	cancer	TCGA-A2-A04P	P35_C
k28_205119_60_147	60	chr7	140732402	140732429	-	0	27	none	none	chr7	93536047	93536080	+	27	60	ENST00000248572	GNGT1	GeneDesertChimera	cds unchanged, alternative 5UTR from gene-desert	5'UTR change	3.11	cancer specific	cancer	TCGA-AN-A0AK	P39_C
k28_539625_1426_19519	1419	chr8	101964208	101964358	+	1268	1418	ENST00000395957	YWHAZ	chr19	18307764	18314820	+	0	1291	ENST00000222256	RAB3A	IntergenicChimera	cds unchanged, alternative 5UTR	5'UTR change	3.18	cancer specific	cancer	TCGA-BH-A0AW	P16_C
k26_292775_385_203648	385	chr6	50671509	50671534	-	360	385	none	none	chr22	38201249	38201624	+	0	363	ENST00000340857	H1F0	GeneDesertChimera	cds unchanged, alternative 5UTR from gene-desert	5'UTR change	3.43	cancer specific	cancer	TCGA-AO-A03O	P38_C
k34_491298_1423_16286	1423	chr22	36783851	36783881	+	1393	1423	ENST00000216181	MYH9	chr22	38524275	38565481	+	0	1396	ENST00000332509	PLA2G6	IntergenicChimera	cds unchanged, alternative 5UTR	5'UTR change	3.71	cancer specific	cancer	TCGA-A2-A04U	P25_C
k26_228556_112_4702	112	chr19	50223328	50223353	-	0	25	ENST00000498085	CTB-33G10.1	chr19	54704768	54705052	+	26	112	ENST00000391752	RPS9	IntergenicChimera	cds unchanged, alternative 5UTR from NonCoding	5'UTR change	5.02	cancer specific	cancer	TCGA-AN-A046	P50_C
k44_270793_691_52669	691	chr20	37055060	37064046	-	0	488	ENST00000413755	SNHG17	chr20	52611550	52612591	-	485	691	ENST00000434986	BCAS1	IntergenicChimera	cds unchanged, alternative 5UTR from NonCoding	5'UTR change	23.89	cancer specific	cancer	TCGA-AO-A03M	P20_C
k30_565332_8957_485713	8957	chrX	23595237	23598694	+	0	3462	none	none	chr12	58152899	58159458	-	3446	8957	ENST00000546567	CYP27B1	GeneDesertChimera	cds unchanged, alternative 5UTR from gene-desert	5'UTR change	28.45	cancer specific	cancer	TCGA-AN-A0AM	P40_C
k34_104446_120_243	120	chr8	128867478	128867566	+	0	88	ENST00000504719	PVT1	chr8	124190967	124191001	+	86	120	ENST00000518448	FAM83A	IntergenicChimera	cds unchanged, alternative 5UTR from NonCoding	5'UTR change	35.15	cancer specific	cancer	TCGA-A2-A04U	P25_C
k26_819447_701_19310	701	chr8	128806803	128808255	+	0	293	ENST00000408388	PVT1	chr8	124190966	124191377	+	290	701	ENST00000518448	FAM83A	IntergenicChimera	cds unchanged, alternative 5UTR from NonCoding	5'UTR change	35.15	cancer specific	cancer	TCGA-A2-A04U	P25_C
k32_571510_694_17031	694	chr8	128806803	128806981	+	0	178	ENST00000504719	PVT1	chr8	124190968	124192111	+	177	694	ENST00000518448	FAM83A	IntergenicChimera	cds unchanged, alternative 5UTR from NonCoding	5'UTR change	35.15	cancer specific	cancer	TCGA-A2-A04U	P25_C
k28_704777_2447_201829	2416	chr10	121355944	121356006	+	2354	2416	ENST00000369092	TIAL1	chr10	124591639	124605736	+	0	2355	ENST00000368904	CUZD1	IntergenicChimera	cds unchanged, alternative 5UTR	5'UTR change	97.11	cancer specific	cancer	TCGA-A2-A04U	P25_C

## Sheet: 3'UTR change
Additional File 7. Cancer specific chimeric transcripts with fused 3’ UTRs and having the ORF of the coding gene intact and displaying > 2X change in expression relative to the intact gene’s expression in normal tissue.
#contigId	contigLen	chr1	5tSt	5tEn	strand1	5qSt	5qEn	5tx	geneName1	chr2	3tSt	3tEn	strand2	3qSt	3qEn	3tx	geneName2	chimerType	annotation	functionalClass	5FC	comparisonStatus	diseaseStatus	patientId	assignedSampleId
k26_761229_1066_63953	1066	chr22	35743047	35743505	+	0	458	ENST00000382034	TOM1	chr11	118215072	118223202	+	432	1066	ENST00000392883	CD3G	IntergenicChimera	cds unchanged, alternative 3UTR	3'UTR change	0.01	cancer specific	cancer	TCGA-BH-A0H5	P5_C
k32_68697_94_245	94	chr4	186505049	186505115	-	0	66	ENST00000284776	SORBS2	chr4	186096938	186096968	+	64	94	ENST00000296775	KIAA1430	IntergenicChimera	cds unchanged, alternative 3UTR	3'UTR change	0.04	cancer specific	cancer	TCGA-AO-A03O	P38_C
k26_798695_2106_20428	2081	chr1	204190329	204191148	-	1262	2081	ENST00000272203	PLEKHA6	chr15	74210231	74211519	+	0	1288	ENST00000564194	LOXL1-AS1	IntergenicChimera	cds unchanged, alternative 3UTR from NonCoding	3'UTR change	0.15	cancer specific	cancer	TCGA-A2-A04U	P25_C
k26_415296_1287_19311	1287	chr1	97272420	97279072	+	0	630	ENST00000236228	PTBP2	chr3	185348196	185348878	+	605	1287	ENST00000296257	SENP2	IntergenicChimera	cds unchanged, alternative 3UTR	3'UTR change	0.3	cancer specific	cancer	TCGA-AN-A0AK	P39_C
k32_411201_5543_109689	5543	chr2	239153690	239186581	+	446	5543	ENST00000254657	PER2	chr1	17393255	17393721	+	4	471	ENST00000375486	PADI2	IntergenicChimera	cds unchanged, alternative 3UTR	3'UTR change	0.31	cancer specific	cancer	TCGA-A1-A0SK	P19_C
k26_604788_1900_13326	1900	chr14	96556821	96558069	+	652	1900	ENST00000555004	C14orf132	chr17	26875700	26876377	-	0	677	ENST00000470125	UNC119	IntergenicChimera	cds unchanged, alternative 3UTR	3'UTR change	0.31	cancer specific	cancer	TCGA-AN-A041	P49_C
k28_550944_3824_157958	3798	chr21	47551863	47552648	+	0	785	ENST00000300527	COL6A2	chr1	48762843	48937763	-	754	3798	ENST00000371847	SPATA6	IntergenicChimera	cds unchanged, alternative 3UTR	3'UTR change	0.33	cancer specific	cancer	TCGA-A1-A0SK	P19_C
k26_893299_3451_240750	3451	chr17	80036956	80037087	-	3320	3451	ENST00000306749	FASN	chr9	87426817	87430162	+	0	3345	ENST00000359847	NTRK2	IntergenicChimera	cds unchanged, alternative 3UTR	3'UTR change	0.33	cancer specific	cancer	TCGA-AO-A03T	P28_C
k26_625659_471_102372	471	chr17	10617689	10617767	-	0	78	ENST00000341871	TMEM220	chr15	78841131	78841538	-	63	471	ENST00000044462	PSMA4	IntergenicChimera	cds unchanged, alternative 3UTR	3'UTR change	0.35	cancer specific	cancer	TCGA-BH-A0AW	P16_C
k26_831192_2585_335597	2585	chr8	440862	441292	-	0	430	ENST00000324079	TDRP	chr3	155588587	155655502	-	409	2585	ENST00000496455	GMPS	IntergenicChimera	cds unchanged, alternative 3UTR	3'UTR change	0.39	cancer specific	cancer	TCGA-AN-A04C	P34_C
k28_49763_57_402	57	chr16	89629447	89629474	+	30	57	ENST00000311528	RPL13	chr17	17286673	17286704	-	0	31	ENST00000392730	RPL13P12	IntergenicChimera	cds unchanged, alternative 3UTR from NonCoding	3'UTR change	0.39	cancer specific	cancer	TCGA-AQ-A04H	P11_C
k26_518544_1345_10106	1345	chr14	96556766	96558069	+	0	1303	ENST00000555004	C14orf132	chr17	26876310	26876377	-	1278	1345	ENST00000470125	UNC119	IntergenicChimera	cds unchanged, alternative 3UTR	3'UTR change	0.4	cancer specific	cancer	TCGA-AQ-A04H	P11_C
k26_860181_4142_105669	4142	chr2	37327500	37329067	-	0	1567	ENST00000233057	EIF2AK2	chr9	21324046	21335231	+	1541	4142	ENST00000359039	KLHL9	IntergenicChimera	cds unchanged, alternative 3UTR	3'UTR change	0.44	cancer specific	cancer	TCGA-AN-A04D	P45_C
k28_708603_2854_111284	2854	chr6	137518955	137519777	-	2031	2854	ENST00000367739	IFNGR1	chr1	110602552	110613035	+	0	2056	ENST00000554749	RP4-773N10.4	IntergenicChimera	cds unchanged, alternative 3UTR from NonCoding	3'UTR change	0.46	cancer specific	cancer	TCGA-A2-A04U	P25_C
k40_273520_553_5666	553	chr4	160277020	160279326	+	252	553	ENST00000264431	RAPGEF2	chr4	153701124	153701381	-	0	257	ENST00000353617	ARFIP1	IntergenicChimera	cds unchanged, alternative 3UTR	3'UTR change	0.47	cancer specific	cancer	TCGA-AN-A049	P33_C
k32_625668_954_6510	954	chr10	89731002	89731344	-	612	954	ENST00000371953	PTEN	chr11	17111195	17113767	-	0	643	ENST00000265970	PIK3C2A	IntergenicChimera	cds unchanged, alternative 3UTR	3'UTR change	0.5	cancer specific	cancer	TCGA-AO-A03T	P28_C
k28_535634_2071_127678	2071	chr1	43212044	43228092	-	0	2034	ENST00000397054	LEPRE1	chr6	10709824	10709874	+	2021	2071	ENST00000379568	PAK1IP1	IntergenicChimera	cds unchanged, alternative 3UTR	3'UTR change	2.05	cancer specific	cancer	TCGA-BH-A0B3	P17_C
k26_879811_1136_34797	1136	chr1	100549691	100550110	-	0	418	ENST00000287482	SASS6	chr11	94898704	94899443	-	396	1136	ENST00000536441	SESN3	IntergenicChimera	cds unchanged, alternative 3UTR	3'UTR change	2.06	cancer specific	cancer	TCGA-AN-A04D	P45_C
k26_837012_1346_33236	1346	chr1	100549691	100550324	-	0	633	ENST00000287482	SASS6	chr11	94898709	94899447	-	607	1346	ENST00000536441	SESN3	IntergenicChimera	cds unchanged, alternative 3UTR	3'UTR change	2.07	cancer specific	cancer	TCGA-A2-A04V	P43_C
k36_470382_1490_23462	1490	chr1	32680265	32682118	-	577	1490	ENST00000461402	TMEM234	chr1	32669479	32670987	+	0	577	ENST00000373602	CCDC28B	IntergenicChimera	cds unchanged, alternative 3UTR	3'UTR change	2.08	cancer specific	cancer	TCGA-AO-A03T	P28_C
k26_942830_1595_20509	1587	chr19	6413207	6413424	-	0	217	ENST00000398148	KHSRP	chrX	54467175	54471937	-	190	1587	ENST00000375135	FGD1	IntergenicChimera	cds unchanged, alternative 3UTR	3'UTR change	2.18	cancer specific	cancer	TCGA-AQ-A04L	P24_C
k28_765583_1820_179635	1796	chr19	14198651	14200637	-	0	1282	ENST00000533683	SAMD1	chr3	15483180	15483715	+	1260	1796	ENST00000396842	EAF1	IntergenicChimera	cds unchanged, alternative 3UTR	3'UTR change	2.19	cancer specific	cancer	TCGA-AN-A046	P50_C
k28_414171_3513_583625	3513	chr20	42232397	42275744	-	2283	3513	ENST00000373030	IFT52	chr20	47674987	47707369	-	0	2285	ENST00000262982	CSE1L	IntergenicChimera	cds unchanged, alternative 3UTR	3'UTR change	2.21	cancer specific	cancer	TCGA-AO-A03O	P38_C
k26_481254_1988_72961	1941	chr12	110012611	110035053	+	0	1878	ENST00000228510	MVK	chr19	5915846	5915933	+	1854	1941	ENST00000222125	CAPS	IntergenicChimera	cds unchanged, alternative 3UTR	3'UTR change	2.28	cancer specific	cancer	TCGA-A2-A04W	P15_C
k30_542680_3275_322318	3275	chr1	202985085	202993635	+	0	2239	ENST00000367242	TMEM183A	chr16	46989305	46990370	-	2210	3275	ENST00000317089	DNAJA2	IntergenicChimera	cds unchanged, alternative 3UTR	3'UTR change	2.28	cancer specific	cancer	TCGA-A2-A04T	P36_C
k28_600579_4211_122429	4211	chr20	56928328	56934793	+	0	421	ENST00000244040	RAB22A	chr19	56515101	56573165	+	419	4211	ENST00000390649	NLRP5	IntergenicChimera	cds unchanged, alternative 3UTR	3'UTR change	2.53	cancer specific	cancer	TCGA-AO-A03V	P23_C
k26_588580_2517_247224	2517	chrX	70327320	70331440	-	0	1425	ENST00000374202	IL2RG	chr4	16510156	16900336	-	1397	2517	none	none	GeneDesertChimera	cds unchanged, alternative 3UTR from gene-desert	3'UTR change	2.58	cancer specific	cancer	TCGA-AO-A03M	P20_C
k28_640208_899_4695	899	chr9	91150470	91190241	+	0	421	ENST00000375855	NXNL2	chr2	238014543	238015055	+	387	899	none	none	GeneDesertChimera	cds unchanged, alternative 3UTR from gene-desert	3'UTR change	2.65	cancer specific	cancer	TCGA-BH-A0H5	P5_C
k26_582476_291_305429	291	chr1	207101871	207102135	-	26	291	ENST00000356495	PIGR	chr11	62037648	62037679	+	0	31	ENST00000227918	SCGB2A2	IntergenicChimera	cds unchanged, alternative 3UTR	3'UTR change	2.68	cancer specific	cancer	TCGA-AO-A03U	P22_C
k26_644878_1388_110684	1388	chr4	57327125	57327712	+	0	588	ENST00000264221	PAICS	chr15	58887480	58888306	-	562	1388	ENST00000260408	ADAM10	IntergenicChimera	cds unchanged, alternative 3UTR	3'UTR change	2.72	cancer specific	cancer	TCGA-A1-A0SK	P19_C
k26_928251_1640_20679	1640	chr1	24122399	24125190	-	0	935	ENST00000374497	GALE	chrX	153607820	153609494	-	914	1640	ENST00000369835	EMD	IntergenicChimera	cds unchanged, alternative 3UTR	3'UTR change	2.82	cancer specific	cancer	TCGA-AQ-A04L	P24_C
k30_711048_1124_157472	1089	chr10	71267303	71267424	+	0	121	ENST00000373290	TSPAN15	chr9	114696620	114697608	+	102	1089	ENST00000374279	UGCG	IntergenicChimera	cds unchanged, alternative 3UTR	3'UTR change	2.94	cancer specific	cancer	TCGA-AO-A03N	P21_C
k26_469076_3999_225100	3999	chr10	5681727	5708531	-	0	1792	ENST00000357700	ASB13	chr3	48787840	48884850	-	1786	3999	ENST00000265563	PRKAR2A	IntergenicChimera	cds unchanged, alternative 3UTR	3'UTR change	3.03	cancer specific	cancer	TCGA-AO-A03O	P38_C
k28_559499_1405_192263	1405	chr19	18417725	18418140	-	989	1405	ENST00000593829	LSM4	chr6	88384761	88411238	+	0	1002	ENST00000420494	RP3-486L4.4	IntergenicChimera	cds unchanged, alternative 3UTR from NonCoding	3'UTR change	3.08	cancer specific	cancer	TCGA-AN-A0AL	P32_C
k26_613101_1485_79133	1466	chr22	35743047	35743505	+	0	458	ENST00000382034	TOM1	chr11	118215072	118224239	+	432	1466	ENST00000392883	CD3G	IntergenicChimera	cds unchanged, alternative 3UTR	3'UTR change	3.16	cancer specific	cancer	TCGA-AO-A03M	P20_C
k38_306387_82_218	82	chr2	90078269	90078312	+	0	43	ENST00000390270	IGKV3D-20	chr2	89161039	89161075	-	46	82	ENST00000452230	AC096579.13	IntergenicChimera	cds unchanged, alternative 3UTR from NonCoding	3'UTR change	3.5	cancer specific	cancer	TCGA-BH-A0B3	P17_C
k26_734043_2728_239294	2728	chr1	20809952	20811951	+	2222	2728	ENST00000375078	CAMK2N1	chr11	45957186	46142711	+	0	2250	ENST00000257821	PHF21A	IntergenicChimera	cds unchanged, alternative 3UTR	3'UTR change	3.52	cancer specific	cancer	TCGA-AQ-A04H	P11_C
k30_514928_175_823	175	chr14	105947730	105947879	+	0	149	ENST00000329146	CRIP2	chr3	25728425	25728452	+	148	175	ENST00000425396	CRIP1P2	IntergenicChimera	cds unchanged, alternative 3UTR from NonCoding	3'UTR change	3.55	cancer specific	cancer	TCGA-AN-A046	P50_C
k44_233704_492_32036	492	chr14	107034726	107035232	-	0	423	ENST00000390626	IGHV5-51	chr14	106330432	106691690	-	403	492	none	none	GeneDesertChimera	cds unchanged, alternative 3UTR from gene-desert	3'UTR change	3.63	cancer specific	cancer	TCGA-BH-A0B3	P17_C
k26_551783_733_18900	733	chr3	140866023	140866515	+	0	492	ENST00000310546	SPSB4	chr22	36157248	36164361	-	467	733	ENST00000262829	RBFOX2	IntergenicChimera	cds unchanged, alternative 3UTR	3'UTR change	3.84	cancer specific	cancer	TCGA-AN-A04A	P42_C
k28_752338_3924_600999	3924	chr17	38511515	38512898	-	3128	3924	ENST00000254066	RARA	chr17	40989643	40996201	-	0	3138	ENST00000293362	PSME3	IntergenicChimera	cds unchanged, alternative 3UTR	3'UTR change	3.98	cancer specific	cancer	TCGA-AN-A041	P49_C
k28_381988_79_271	79	chr14	105947824	105947879	+	0	55	ENST00000329146	CRIP2	chr3	25728425	25728450	+	54	79	ENST00000425396	CRIP1P2	IntergenicChimera	cds unchanged, alternative 3UTR from NonCoding	3'UTR change	4.13	cancer specific	cancer	TCGA-AN-A0AS	P41_C
k30_636691_1334_106152	1334	chr11	15994139	15994473	-	0	334	ENST00000316399	SOX6	chr1	52486153	52520828	+	304	1334	ENST00000371626	TXNDC12	IntergenicChimera	cds unchanged, alternative 3UTR	3'UTR change	4.15	cancer specific	cancer	TCGA-A2-A04X	P37_C
k36_523653_4190_457717	4183	chr1	89572135	89572737	-	0	602	ENST00000464839	GBP2	chr12	65553435	65557017	+	601	4183	none	none	GeneDesertChimera	cds unchanged, alternative 3UTR from gene-desert	3'UTR change	4.88	cancer specific	cancer	TCGA-AN-A0AM	P40_C
k28_40632_208_719	208	chr14	105947695	105947879	+	0	184	ENST00000329146	CRIP2	chr3	25728425	25728450	+	183	208	ENST00000425396	CRIP1P2	IntergenicChimera	cds unchanged, alternative 3UTR from NonCoding	3'UTR change	5.15	cancer specific	cancer	TCGA-AN-A049	P33_C
k28_460480_144_492	144	chr14	105947759	105947879	-	24	144	ENST00000329146	CRIP2	chr3	25728425	25728450	-	0	25	ENST00000425396	CRIP1P2	IntergenicChimera	cds unchanged, alternative 3UTR from NonCoding	3'UTR change	5.83	cancer specific	cancer	TCGA-AO-A03M	P20_C
k26_609827_1740_236399	1740	chr11	118964583	118965786	-	0	1203	ENST00000530167	H2AFX	chr3	113005739	113006293	+	1186	1740	ENST00000273395	BOC	IntergenicChimera	cds unchanged, alternative 3UTR	3'UTR change	6.01	cancer specific	cancer	TCGA-BH-A0B3	P17_C
k26_959770_572_28689	572	chr11	118964583	118964661	-	493	572	ENST00000530167	H2AFX	chr3	113005739	113006249	+	0	510	ENST00000273395	BOC	IntergenicChimera	cds unchanged, alternative 3UTR	3'UTR change	6.91	cancer specific	cancer	TCGA-AO-A03N	P21_C
k30_437758_3534_206622	3534	chr8	100523331	100589863	-	2536	3534	ENST00000496144	VPS13B	chr8	145721841	145727503	-	0	2540	ENST00000528207	CTD-2517M22.14	IntergenicChimera	cds unchanged, alternative 3UTR from NonCoding	3'UTR change	6.97	cancer specific	cancer	TCGA-BH-A0B1	P13_C
k44_300441_2171_21407	2171	chr2	242792876	242801040	-	0	1250	ENST00000334409	PDCD1	chr16	67226126	67229823	-	1220	2171	ENST00000379378	E2F4	IntergenicChimera	cds unchanged, alternative 3UTR	3'UTR change	8.53	cancer specific	cancer	TCGA-BH-A0H5	P5_C
k26_736365_2655_41948	2655	chr17	77807076	77807140	-	0	64	ENST00000269397	CBX4	chr12	4382948	4410659	-	42	2655	ENST00000261254	CCND2	IntergenicChimera	cds unchanged, alternative 3UTR	3'UTR change	10.63	cancer specific	cancer	TCGA-AQ-A04H	P11_C
k36_531605_5255_277881	5255	chr12	68052384	68052520	+	0	136	ENST00000393555	DYRK2	chr5	14143916	14420132	-	132	5255	none	none	GeneDesertChimera	cds unchanged, alternative 3UTR from gene-desert	3'UTR change	13.25	cancer specific	cancer	TCGA-AN-A0AM	P40_C
k34_594833_108_225	108	chr17	38904490	38904569	-	0	79	ENST00000312150	KRT25	chr17	37571277	37571309	+	76	108	ENST00000300651	MED1	IntergenicChimera	cds unchanged, alternative 3UTR	3'UTR change	18.63	cancer specific	cancer	TCGA-AN-A04C	P34_C
k36_534936_5255_265709	5255	chr12	68053230	68053366	+	0	136	ENST00000344096	DYRK2	chr5	14143916	14420130	-	134	5255	none	none	GeneDesertChimera	cds unchanged, alternative 3UTR from gene-desert	3'UTR change	19.51	cancer specific	cancer	TCGA-AN-A0AM	P40_C
k38_445649_389_2849	389	chr15	39893045	39893081	-	0	36	ENST00000350221	FSIP1	chr15	39178964	39363816	-	22	389	ENST00000558209	RP11-624L4.1	IntergenicChimera	cds unchanged, alternative 3UTR from NonCoding	3'UTR change	35.07	cancer specific	cancer	TCGA-A2-A04V	P43_C
k26_483505_842_20335	842	chr6	132891849	132893383	+	0	179	ENST00000275198	TAAR6	chr6	117271776	117272442	-	176	842	none	none	GeneDesertChimera	cds unchanged, alternative 3UTR from gene-desert	3'UTR change	2147.77	cancer specific	cancer	TCGA-A2-A04W	P15_C
k30_120736_131_2581	131	chr4	125244535	125244638	-	0	103	ENST00000372164	TSPAN14	chr10	82279488	82279517	-	102	131	none	none	GeneDesertChimera	cds unchanged, alternative 3UTR from gene-desert	3'UTR change	8.06	cancer specific	cancer	TCGA-AQ-A04L	P24_C
k26_2110507_515_4214	515	chr20	57510342	57510775	-	0	433	ENST00000371711	B4GALT5	chr20	48248616	48248697	+	434	515	none	none	GeneDesertChimera	cds unchanged, alternative 3UTR from gene-desert	3'UTR change	2.94	cancer specific	cancer	TCGA-A2-A04Y	P44_C
